# Supplementary material
Source: PubMed Central journal article supplement (PMC2265140)

|       |                                                                                   |   |   |   |
|-------|-----------------------------------------------------------------------------------|---|---|---|
| Myocd | +                                                                                 | + | + | + |
| p65   |  |   |   |   |
| SRF   | +                                                                                 | + | + | + |
| Lane  | 1                                                                                 | 2 | 3 | 4 |

|                                                                                   |   |   |   |
|-----------------------------------------------------------------------------------|---|---|---|
|  |   |   |   |
| +                                                                                 | + | + | + |
| +                                                                                 | + | + | + |
| 5                                                                                 | 6 | 7 | 8 |

SRF +  
Myocd 

SRF 

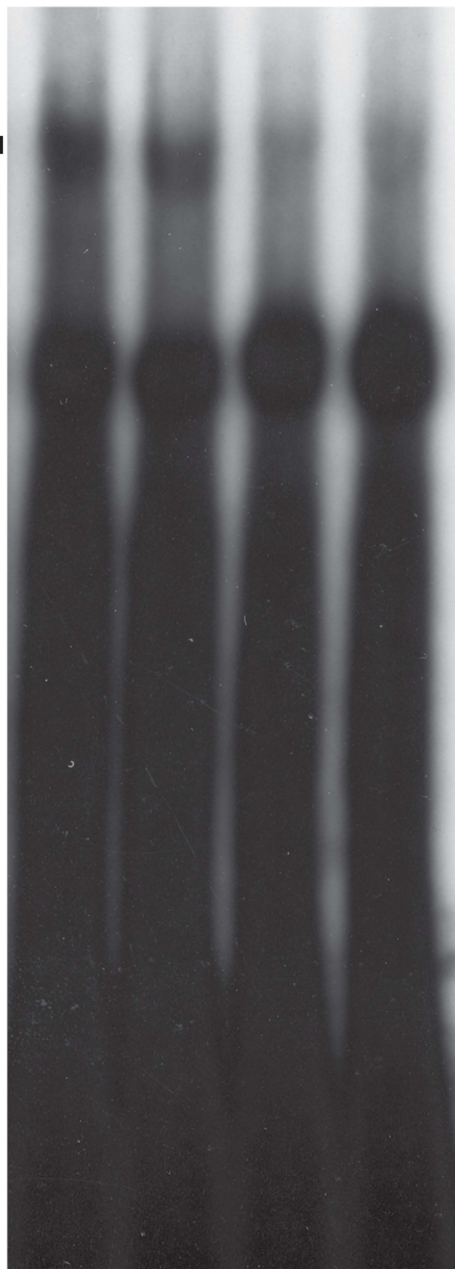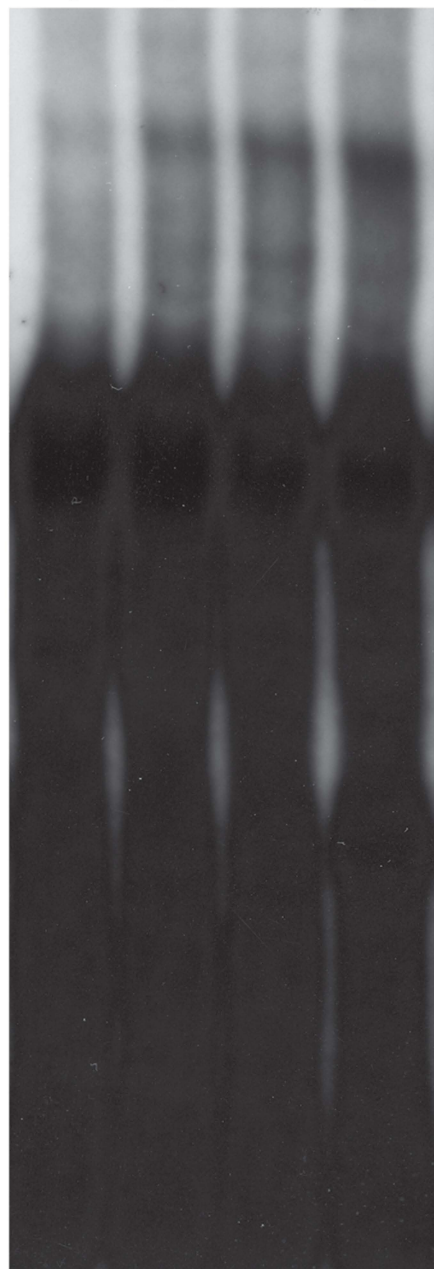

Supplement: pnas_0705842105_1.pdf [file pnas_0705842105_1.pdf]

**a**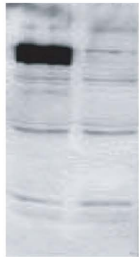

Myocd

**b**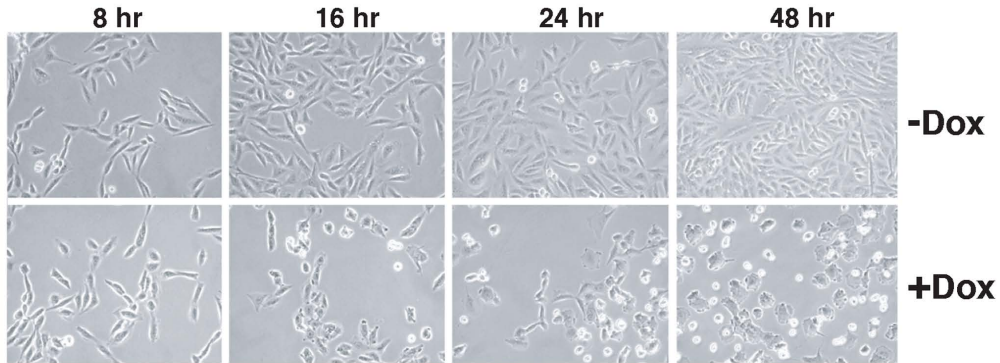

Supplement: pnas_0705842105_2.pdf [file pnas_0705842105_2.pdf]
